# Supplementary material
Source: Springer Nature journal article supplement (https://www.springermedizin.de/resource/supplementary/12935_2010_246_MOESM4_ESM.pdf/9540140)

**a**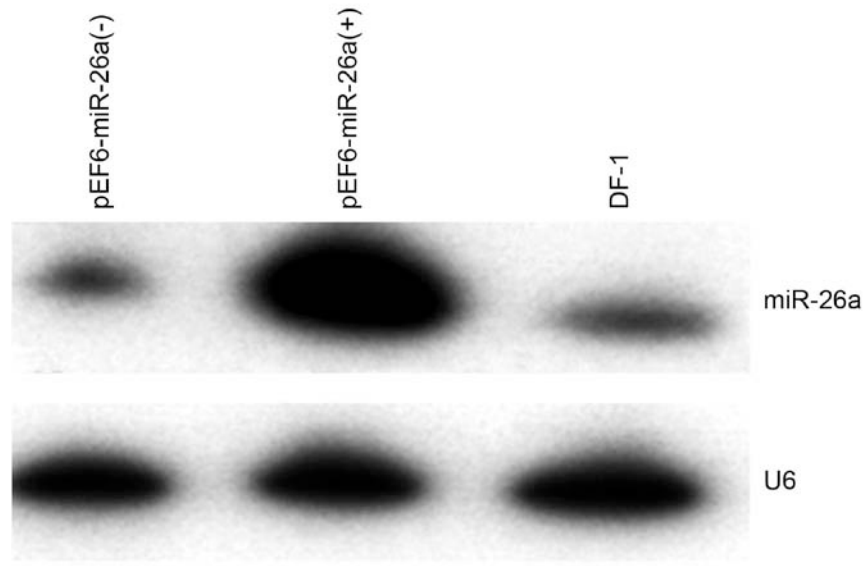**b**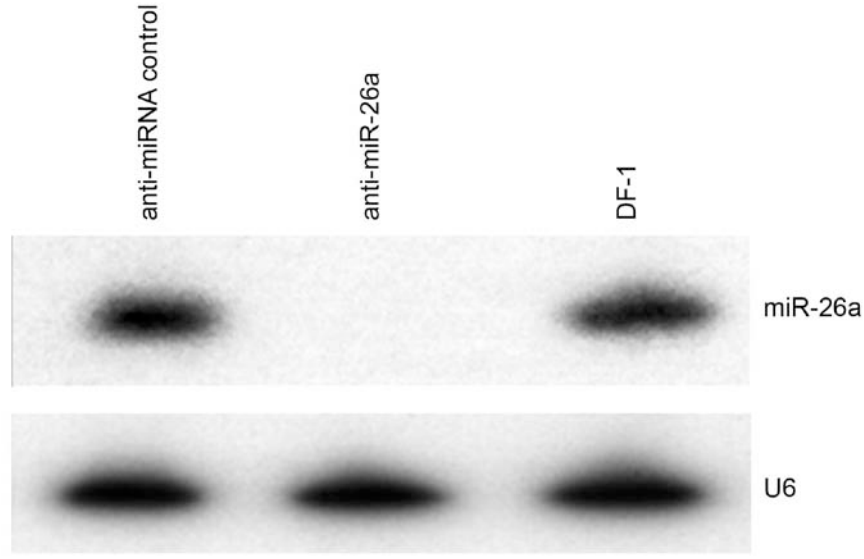**c**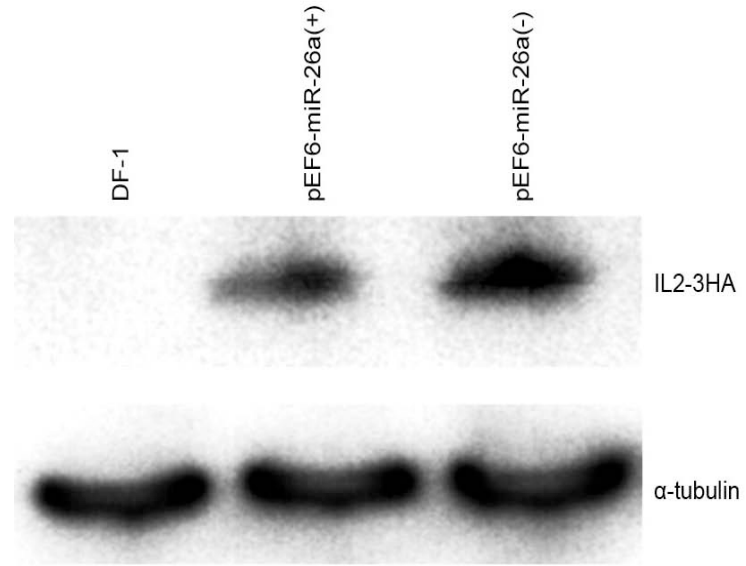**d**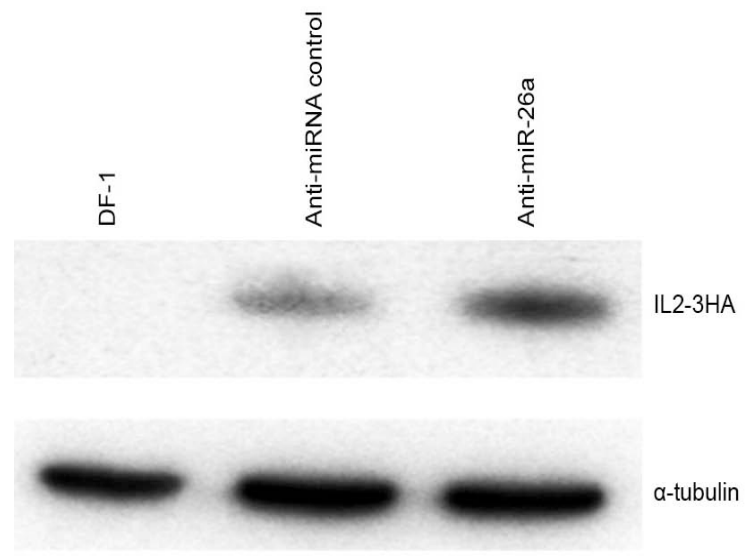

Supplement: MOESM4 [file 9540140]
